# Supplementary material for: Increased sediment load during a large-scale dam removal changes nearshore subtidal communities
Source: PLOS journal article supplement (doi:10.1371/journal.pone.0187742), 2017-12-08
Supplement: S12 (10.1371/journal.pone.0187742.s012) [file journal.pone.0187742.s012]

**S8 Table. General additive models (GAMs) of the response of vegetation cover (%) to a combination of predictors.**

| Predictor                        | Term type  | Statistic                     | Dataset            |                    |
|----------------------------------|------------|-------------------------------|--------------------|--------------------|
|                                  |            |                               | Dive               | Video              |
| Initial depth                    | Smooth, ti | EDF                           | 1.0                | 3.2                |
|                                  |            | F                             | 8.9                | 7.4                |
|                                  |            | P                             | 0.004              | 0.000              |
| Initial percent sand             | Smooth, s  | EDF                           | 4.6                | NA                 |
|                                  |            | F                             | 2.7                | NA                 |
|                                  |            | P                             | 0.021              | NA                 |
| Reflectance change               | Smooth, ti | EDF                           | 3.3                | 2.3                |
|                                  |            | F                             | 69.8               | 11.0               |
|                                  |            | P                             | 0.000              | 0.000              |
| Initial depth*reflectance change | Smooth, ti | EDF                           | 2.8                | 1.8                |
|                                  |            | F                             | 6.0                | 1.9                |
|                                  |            | P                             | 0.001              | 0.100 <sup>a</sup> |
| Substrate change                 | Parametric | Coefficient                   | -1.58 <sup>b</sup> | NA                 |
|                                  |            | F                             | 41.4               | NA                 |
|                                  |            | P                             | 0.000              | NA                 |
| Combined                         |            | R <sup>2</sup> <sub>adj</sub> | 88.7               | 27.2               |

Smooth terms: s = 1-dimensional smooth appropriate for a single predictor; ti = 2-dimensional smooth appropriate for a main effects-plus-interaction structure. EDF = estimated degrees of freedom; the greater the EDF the more wiggly the curve with EDF = 1.0 indicating a straight line. Note that initial reflectance was dropped from the dive GAM due to non-significance and was excluded from the video GAM due to high correlation with initial depth ( $r = -0.52$ ).

<sup>a</sup>Although not significant, dropping initial depth\*reflectance change from the model increased AIC<sub>c</sub> from 1681 to 1689. We therefore judged the model that included initial depth\*reflectance change to be the better model; <sup>b</sup>Indicates the change in  $\ln(y+1)$  transposed vegetation cover for substrate change = yes relative to substrate change = no.
